# Supplementary material for: Human Bone Mesenchymal Stem Cell-Derived Exosomes Inhibit IL-1β-Induced Inflammation in Osteoarthritis Chondrocytes
Source: PubMed Central journal article supplement (PMC8405079; doi:10.22074/cellj.2021.7127), 2021-08-29
Supplement: Cell-J-23-485-s01.pdf [file Cell-J-23-485-s01.pdf]

## Supplementary Information for

# Human Bone Mesenchymal Stem Cell-Derived Exosomes Inhibit IL-1 $\beta$ -Induced Inflammation in Osteoarthritis Chondrocytes

Liping Zhou, M.M.<sup>1\*</sup>, Haiwei Ye, M.D.<sup>1</sup>, Lizhen Liu, M.D.<sup>2</sup>, Yunhua Chen, M.B.B.S.<sup>1</sup>

1. Chemical Pharmaceutical Research Institute, Taizhou Vocational and Technical College, Taizhou, Zhejiang, China

2. Bone Marrow Transplantation Centre, First Affiliated Hospital of Zhejiang University School of Medicine, Hangzhou, Zhejiang, China

\*Corresponding Address: Chemical Pharmaceutical Research Institute, Taizhou Vocational and Technical College, Taizhou, Zhejiang, China  
Email: lipingzhou788@aliyun.com

Table S1: Primer sequences used in this study

| Gene                          | Primer sequence (5'-3')                                    |
|-------------------------------|------------------------------------------------------------|
| <i>Survivin</i>               | F: AGGACCACCGCATCTCTACAT<br>R: AAGTCTGGCTCGTTCTCAGTG       |
| <i>PCNA</i>                   | F: GCGTGAACCTCACCAGTATGT<br>R: TCTTCGGCCCTTAGTGTAATGAT     |
| <i>TNF-<math>\beta</math></i> | F: ATGACACCACCTGAACGTCTC<br>R: CTCTCCAGAGCAGTGAGTTCT       |
| <i>IL-1<math>\beta</math></i> | F: ATGATGGCTTATTACAGTGGCAA<br>R: GTCGGAGATTCGTAGCTGGA      |
| <i>IL-6</i>                   | F: CCTGAACCTTCCAAAGATGGC<br>R: TTCACCAGGCAAGTCTCCTCA       |
| <i>SOX9</i>                   | F: AGCGAACGCACATCAAGAC<br>R: CTGTAGGCGATCTGTTGGGG          |
| <i>MMP-13</i>                 | F: ACTGAGAGGCTCCGAGAAATG<br>R: GAACCCGCATCTTGGCTT          |
| <i>Versican</i>               | F: GTAACCCATGCGCTACATAAAGT<br>R: GGCAAAGTAGGCATCGTTGAAA    |
| <i>TGFB1</i>                  | F: GGCCAGATCCTGTCCAAGC<br>R: GTGGGTTTCCACCATTAGCAC         |
| <i>BCL-2</i>                  | F: AGTACCTGAACCGGCACCT<br>R: CCACCAGGGCCAAACTGAGCA         |
| <i>COL2A1</i>                 | F: TGCTGCCAGATGGCTGGAGGA<br>R: TGCCTTGAAATCCTTGAGGCC       |
| <i>Aggrecan</i>               | F: GTGCCTATCAGGACAAGGTCT<br>R: GATGCCTTTCACCACGACTTC       |
| <i>GAPDH</i>                  | F: TGACAACCTTGGTATCGTGGAAGG<br>R: AGGCAGGGATGATGTTCTGGAGAG |
